# Supplementary material for: Changes in cerebral metabolites in obstructive sleep apnea: a systemic review and meta-analysis
Source: PubMed Central journal article supplement (PMC4923864; doi:10.1038/srep28712), 2016-06-28
Supplement: srep28712-s1.pdf [file srep28712-s1.pdf]

# **Changes in cerebral metabolites in obstructive sleep apnea: a systemic review and meta-analysis**

Yunyan Xia<sup>1,2,3,\*</sup>, MD, Yiqun Fu<sup>1,2,3,\*</sup>, MD, Huajun Xu<sup>1,2,3</sup>, MD, Jian Guan<sup>1,2,3</sup>, MD, PhD,  
Hongliang Yi<sup>1,2,3</sup>, MD, PhD, and Shankai Yin<sup>1,2,3</sup>, MD, PhD

1 Department of Otolaryngology Head and Neck Surgery& Center of Sleep Medicine,  
Shanghai Jiao Tong University Affiliated Sixth People's Hospital, Yishan Road 600,  
Shanghai, 200233, China.

2 Otolaryngological Institute of Shanghai Jiao Tong University, Yishan Road 600,  
Shanghai, 200233, China.

3 Clinical Research Center, Shanghai Jiao Tong University School of Medicine, South  
Chongqing Road 225, Shanghai, 200020, China.

\*these authors contributed equally to this paper.

Corresponding author: Huajun Xu, MD(E-mail:sunnydayxu2010@163.com), and Jian  
Guan, MD, PhD(E-mail: [guanjian0606@sina.com](mailto:guanjian0606@sina.com))

**Supplementary Table 1** Cerebral metabolites with different units in different studies in OSA and control group

| Study                                | OSA                                    | Control                                | <i>p</i> |
|--------------------------------------|----------------------------------------|----------------------------------------|----------|
| <b>NAA in hippocampus</b>            |                                        |                                        |          |
| Bartlett et al <sup>31</sup> ,2004   | 9.94±6.68(relative to water resonance) | 9.06±2.86(relative to water resonance) | 1.00     |
| Kizilgoz et al <sup>34</sup> ,2013   | 1.57±0.63(N/A)                         | 2.36±0.42(N/A)                         | -        |
| Sharma et al <sup>38</sup> ,2010     | 6.19±1.22(mmol/L)                      | 6.13±0.93(mmol/L)                      | 0.90     |
| <b>Cr in hippocampus</b>             |                                        |                                        |          |
| Bartlett et al <sup>31</sup> ,2004   | 6.94±6.13(relative to water resonance) | 9.62±3.79(relative to water resonance) | <0.01    |
| Kizilgoz et al <sup>34</sup> ,2013   | 0.8±0.13(N/A)                          | 0.92±0.11(N/A)                         | -        |
| Sharma et al <sup>38</sup> ,2010     | 4.78±1(mmol/L)                         | 5.21±0.84(mmol/L)                      | 0.29     |
| <b>NAA in frontal lobe</b>           |                                        |                                        |          |
| Alchanatis et al <sup>35</sup> ,2004 | 7.04±0.97(mmol/kg wet weight)          | 7.64±0.89(mmol/kg wet weight)          | -        |
| Gharraf et al <sup>36</sup> ,2014    | 37±4.19(mmol/L)                        | 47±1.70(mmol/L)                        | <0.01    |
| Sharma et al <sup>38</sup> ,2010     | 7.07±0.76(mmol/L)                      | 7.03±1.06(mmol/L)                      | -        |
| <b>Cho in frontal lobe</b>           |                                        |                                        |          |
| Alchanatis et al <sup>35</sup> ,2004 | 1.58±0.14(mmol/kg wet weight)          | 1.88±0.5(mmol/kg wet weight)           | -        |
| Gharraf et al <sup>36</sup> ,2014    | 23.4±0.63(mmol/L)                      | 27.5±1.51(mmol/L)                      | <0.01    |
| Sharma et al <sup>38</sup> ,2010     | 1.63±0.8(mmol/L)                       | 1.38±0.4(mmol/L)                       | -        |
| <b>NAA in frontal white matter</b>   |                                        |                                        |          |
| Alchanatis et al <sup>35</sup> ,2004 | 6.76±1.06(mmol/kg wet weight)          | 7.68±1.06(mmol/kg wet weight)          | 0.04     |
| Gharraf et al <sup>36</sup> ,2014    | 37±4.19(mmol/L)                        | 47±1.70(mmol/L)                        | <0.01    |
| Sharma et al <sup>38</sup> ,2010     | 7.50±0.69(mmol/L)                      | 7.57±2.07(mmol/L)                      | 0.94     |
| <b>Cho in frontal white matter</b>   |                                        |                                        |          |
| Alchanatis et al <sup>35</sup> ,2004 | 1.75±0.33(mmol/kg wet weight)          | 2.18±0.44(mmol/kg wet weight)          | 0.02     |
| Gharraf et al <sup>36</sup> ,2014    | 23.4±0.63(mmol/L)                      | 27.5±1.51(mmol/L)                      | <0.01    |
| Sharma et al <sup>38</sup> ,2010     | 2.22±0.25(mmol/L)                      | 1.87±0.21(mmol/L)                      | 0.09     |

**Abbreviations:** NAA, N-acetylaspartate; Cho, choline; Cr, creatine; OSA, Obstructive sleep apnea;

N/A, not afford.
