# Supplementary material for: Changes in cerebral metabolites in obstructive sleep apnea: a systemic review and meta-analysis
Source: PubMed Central journal article supplement (PMC4923864; doi:10.1038/srep28712), 2016-06-28
Supplement: srep28712-s2.pdf [file srep28712-s2.pdf]

# **Changes in cerebral metabolites in obstructive sleep apnea: a systemic review and meta-analysis**

Yunyan Xia<sup>1,2,3,\*</sup>, MD, Yiqun Fu<sup>1,2,3,\*</sup>, MD, Huajun Xu<sup>1,2,3</sup>, MD, Jian Guan<sup>1,2,3</sup>, MD, PhD,  
Hongliang Yi<sup>1,2,3</sup>, MD, PhD, and Shankai Yin<sup>1,2,3</sup>, MD, PhD

1 Department of Otolaryngology Head and Neck Surgery& Center of Sleep Medicine,  
Shanghai Jiao Tong University Affiliated Sixth People's Hospital, Yishan Road 600,  
Shanghai, 200233, China.

2 Otolaryngological Institute of Shanghai Jiao Tong University, Yishan Road 600,  
Shanghai, 200233, China.

3 Clinical Research Center, Shanghai Jiao Tong University School of Medicine, South  
Chongqing Road 225, Shanghai, 200020, China.

\*these authors contributed equally to this paper.

Corresponding author: Huajun Xu, MD(E-mail:sunnydayxu2010@163.com), and Jian  
Guan, MD, PhD(E-mail: [guanjian0606@sina.com](mailto:guanjian0606@sina.com))

**Supplementary Table 2** Sensitivity analysis of the results of changes in cerebral metabolite

| Study                                                                           | OSA       | Control   | Weight% | MD [95%CI]           | <i>p</i> | I <sup>2</sup> % | <i>p</i> | <i>P</i> <sub>Begg</sub> | <i>P</i> <sub>Egger</sub> |
|---------------------------------------------------------------------------------|-----------|-----------|---------|----------------------|----------|------------------|----------|--------------------------|---------------------------|
| <b>NAA/Cho in hippocampus(with exclusion of the study of Halbower et al)</b>    |           |           |         |                      |          |                  |          |                          |                           |
| Algin et al <sup>33</sup> ,2012                                                 | 1.07±0.1  | 1.11±0.2  | 74.5    | -0.04 [-0.18, 0.10]  |          |                  |          |                          |                           |
| Kizilgoz et al <sup>34</sup> ,2013                                              | 2.06±0.99 | 2.25±0.67 | 5.2     | -0.19 [-0.71, 0.33]  |          |                  |          |                          |                           |
| O'Donoghue et al <sup>32</sup> ,2012                                            | 4.15±0.52 | 4.04±0.45 | 20.3    | 0.11 [-0.15, 0.37]   |          |                  |          |                          |                           |
| <b>Pooled</b>                                                                   |           |           | 100     | -0.12 [-0.36, 0.10]  | 0.49     | 0                | 0.77     | 0.30                     | 0.09                      |
| <b>Cho/Cr in hippocampus(with exclusion of the study of Halbower et al)</b>     |           |           |         |                      |          |                  |          |                          |                           |
| Algin et al <sup>33</sup> ,2012                                                 | 1.09±0.1  | 1.15±0.1  | 0.1     | -0.06 [-0.14, 0.02]  |          |                  |          |                          |                           |
| Kizilgoz et al <sup>34</sup> ,2013                                              | 1.18±0.92 | 1.25±0.78 | 7.4     | -0.07 [-0.63, 0.49]  |          |                  |          |                          |                           |
| O'Donoghue et al <sup>32</sup> ,2012                                            | 0.38±0.04 | 0.41±0.04 | 92.4    | 0.43 [0.10, 0.76]    |          |                  |          |                          |                           |
| <b>Pooled</b>                                                                   |           |           | 100     | -0.01 [-0.10, -0.01] | 0.75     | 0                | <0.01    | 1.00                     | 0.68                      |
| <b>NAA/Cho in frontal lobe(with exclusion of the study of Alchanatis et al)</b> |           |           |         |                      |          |                  |          |                          |                           |
| Algin et al <sup>33</sup> ,2012                                                 | 1.48±0.08 | 1.99±0.36 | 59.8    | -0.51 [-0.68, -0.34] |          |                  |          |                          |                           |
| Halbower et al <sup>26</sup> ,2006                                              | 1.6±0.4   | 2.2±0.4   | 8.9     | -0.60 [-1.04, -0.16] |          |                  |          |                          |                           |
| O'Donoghue et al <sup>32</sup> ,2012                                            | 4.56±0.41 | 4.92±0.44 | 31.3    | -0.36 [-0.59, -0.13] |          |                  |          |                          |                           |
| <b>Pooled</b>                                                                   |           |           | 100     | -0.32 [-0.64, -0.34] | 0.49     | 0                | <0.01    | 1.00                     | 0.82                      |
| <b>NAA/Cho in frontal lobe(with exclusion of the study of Algin et al)</b>      |           |           |         |                      |          |                  |          |                          |                           |
| Alchanatis et al <sup>35</sup> ,2004                                            | 1.89±0.43 | 1.78±0.42 | 36.3    | 0.11 [-0.11, 0.33]   |          |                  |          |                          |                           |
| Halbower et al <sup>26</sup> ,2006                                              | 1.6±0.4   | 2.2±0.4   | 27.6    | -0.60 [-1.04, -0.16] |          |                  |          |                          |                           |
| O'Donoghue et al <sup>32</sup> ,2012                                            | 4.56±0.41 | 4.92±0.44 | 36.0    | -0.36 [-0.59, -0.13] |          |                  |          |                          |                           |
| <b>Pooled</b>                                                                   |           |           | 100     | -0.26 [-0.66, 0.15]  | <0.0     | 84               | 0.21     | 1.00                     | 0.57                      |
| <b>NAA/Cho in frontal lobe(with exclusion of the study of Halbower et al)</b>   |           |           |         |                      |          |                  |          |                          |                           |
| Alchanatis et al <sup>35</sup> ,2004                                            | 1.89±0.43 | 1.78±0.42 | 32.8    | 0.11 [-0.11, 0.33]   |          |                  |          |                          |                           |
| Algin et al <sup>33</sup> ,2012                                                 | 1.48±0.08 | 1.99±0.36 | 34.6    | -0.51 [-0.68, -0.34] |          |                  |          |                          |                           |
| O'Donoghue et al <sup>32</sup> ,2012                                            | 4.56±0.41 | 4.92±0.44 | 32.5    | -0.36 [-0.59, -0.13] |          |                  |          |                          |                           |
| <b>Pooled</b>                                                                   |           |           | 100     | -0.26 [-0.63, 0.11]  | <0.0     | 90               | 0.17     | 0.30                     | 0.14                      |
| <b>NAA/Cho in frontal lobe(with exclusion of the study of O'Donoghue et al)</b> |           |           |         |                      |          |                  |          |                          |                           |
| Alchanatis et al <sup>35</sup> ,2004                                            | 1.89±0.43 | 1.78±0.42 | 26.4    | 0.11 [-0.11, 0.33]   |          |                  |          |                          |                           |
| Algin et al <sup>33</sup> ,2012                                                 | 1.48±0.08 | 1.99±0.36 | 28.0    | -0.51 [-0.68, -0.34] |          |                  |          |                          |                           |
| Halbower et al <sup>26</sup> ,2006                                              | 1.6±0.4   | 2.2±0.4   | 19.3    | -0.60 [-1.04, -0.16] |          |                  |          |                          |                           |
| <b>Pooled</b>                                                                   |           |           | 100     | -0.32 [-0.78, 0.15]  | <0.0     | 90               | 0.18     | 1.00                     | 0.82                      |

**Abbreviations:** NAA, N-acetylaspartate; Cho, choline;Cr, creatine; OSA, Obstructive sleep apnea; MD,

Mean difference; CI, Confidence Interval; *P*<sub>Begg</sub>, *p*-value of Begg's test; *P*<sub>Egger</sub>, *p*-value of Egger test
